# Supplementary material for: Geographic barriers to establishing a successful hospital referral system in rural Madagascar
Source: PubMed Central journal article supplement — BMJ Glob Health. 2021 Dec 8;6(12):e007145. doi: 10.1136/bmjgh-2021-007145 (PMC8655550; doi:10.1136/bmjgh-2021-007145), 2021-12-08
Supplement: bmjgh-2021-007145supp001.pdf [file bmjgh-2021-007145supp001.pdf]

## SUPPLEMENTARY INFORMATION APPENDIX

### Geographic barriers to establishing a successful hospital referral system in rural Madagascar

Felana Angella Ihantamalala<sup>1,2\*</sup>, Matthew H Bonds<sup>1,2</sup>, Mauricianot Randriamihaja<sup>1</sup>, Luc Rakotonirina<sup>1</sup>, Vincent Herbreteau<sup>3</sup>, Christophe Révillion<sup>4</sup>, Serge Rakotoarimanana<sup>1</sup>, Giovanna Cowley<sup>1</sup>, AndritianaTsinomen'ny Aina<sup>1</sup>, Alishya Mayfield<sup>1,2,5</sup>, Michael Rich<sup>1,5,6</sup>, Rado JL Rakotonanahary<sup>1</sup>, Karen E Finnegan<sup>1,2</sup>, Andriamanolohaja Ramarson<sup>1</sup>, Benedicte Razafinjato<sup>1</sup>, Bruno Ramiandrisoa<sup>7</sup>, Andriamihaja Randrianambinina<sup>7</sup>, Laura F Cordier<sup>1</sup>, Andres Garchitorena<sup>1,8</sup>

<sup>1</sup>NGO PIVOT, Ranomafana, Madagascar

<sup>2</sup>Department of Global Health and Social Medicine, Harvard Medical School, Boston, USA

<sup>3</sup>Espace-Dev, IRD, Univ Antilles, Univ Guyane, Univ Montpellier, Univ Réunion, Phnom Penh, Cambodia

<sup>4</sup>Espace-Dev, IRD, Univ Antilles, Univ Guyane, Univ Montpellier, Univ Réunion, Saint-Pierre, La Réunion, France

<sup>5</sup>Division of Global Health Equity, Brigham and Women's Hospital, USA

<sup>6</sup>Partners In Health, USA

<sup>7</sup>Ministry of Health in Madagascar, Antananarivo, Madagascar

<sup>8</sup>MIVEGEC, Univ. Montpellier, CNRS, IRD, Montpellier, France

\*Corresponding author: felana.angella@gmail.com

**Supplementary table S1:** Summary of HSS interventions implemented in Ifanadiana district between 2014 and 2021, classified by building block of HSS\* affected. These included the PIVOT intervention at all three levels of care.

| <b>Level of care</b>                                                                  | <b>Ifanadiana district (PIVOT catchment+RoD)</b>                                                                                                                                                                                                                                                                                                                                                                                                                                                                                                                                                                                                                                                                                                              |                                                                                                                                                                                                                                                                                                                                                                                                                                                                                                        |
|---------------------------------------------------------------------------------------|---------------------------------------------------------------------------------------------------------------------------------------------------------------------------------------------------------------------------------------------------------------------------------------------------------------------------------------------------------------------------------------------------------------------------------------------------------------------------------------------------------------------------------------------------------------------------------------------------------------------------------------------------------------------------------------------------------------------------------------------------------------|--------------------------------------------------------------------------------------------------------------------------------------------------------------------------------------------------------------------------------------------------------------------------------------------------------------------------------------------------------------------------------------------------------------------------------------------------------------------------------------------------------|
| District hospital Total Ifanadiana: 1                                                 | (1) Network of three ambulances for referrals and emergency care; infrastructure renovations, provision of medical and non-medical equipment, including full laboratory capacity; social support for vulnerable patients<br>(2) Staffing of health workers to reach MoH norms; trainings for medical staff<br>(3) Creation of a hospital-based Monitoring and Evaluation team to follow-up progress of activities<br>(4) Supply chain management and reduction of stock-outs (5) Cost of outpatient and inpatient care fully covered for referred patients<br>(6) Creation of a joint PIVOT-MoH executive committee for hospital management and transparency                                                                                                  |                                                                                                                                                                                                                                                                                                                                                                                                                                                                                                        |
|                                                                                       | <b>PIVOT catchment</b>                                                                                                                                                                                                                                                                                                                                                                                                                                                                                                                                                                                                                                                                                                                                        | <b>Ifanadiana district (PIVOT catchment+RoD)</b>                                                                                                                                                                                                                                                                                                                                                                                                                                                       |
| Health centres Total Ifanadiana: 21<br>PIVOT catchments: 7                            | (1) Infrastructure renovations, provision of medical and non-medical equipment; implementation of IMCI and malnutrition protocols for every child under-five<br>(2) Staffing of health centres above MoH norms; frequent trainings for medical staff<br>(3) Joint MoH-PIVOT training and supervision to improve HMIS data quality<br>(4) Supply chain management and reduction of stock-outs<br>(5) Essential medicines and consumables provided free of charge to all patients<br>(6) Close collaboration with district health managers for the planning and implementation of activities                                                                                                                                                                    | (1) Provision of medical and non-medical equipment<br>(2) Staffing to bring all health centres up to MoH norms; trainings for medical staff<br>(5) Basic package of health services free of charge for children under-five and pregnant women                                                                                                                                                                                                                                                          |
| Community health Total Ifanadiana: 195<br>fokontany<br>PIVOT catchment: 123 fokontany | (1) Construction of 81 community health sites by community, with PIVOT support; implementation of IMCI and malnutrition protocols for every child under-five<br>(2) Training and on-site supervision of community health workers by mobile teams of trained nurses every 2months (six nurses for ~40CHWs)<br>(3) Joint MoH-PIVOT training to improve HMIS data quality<br>(4) Monthly provision of MNCH medicine stocks to CHWs and follow-up of medicine stock use<br>(5) Cost of MNCH medicine stocks fully covered by PIVOT and provided free of charge to patients; financial incentives to CHWs for stock management and attendance to supervisions (~\$4 per month); no fees charged to diagnose patients<br>(6) Community engagement and participation | (1) Provision of non-medical equipment and supplies<br>(2) Training every year; monthly performance evaluation at health centres; on-site coaching by technical assistants (one for ~15–35CHWs) every 2months<br>(4) Provision of a free initial stock of products and medicines (subsequent stocks are purchased by CHWs) †<br>(5) CHWs make a profit from a small margin in the sale of medicines (except those in PIVOT catchment who obtain them for free) †; no fees charged to diagnose patients |

\*Building blocks of HSS: (1) service delivery; (2) health workforce; (3) health information systems; (4) medicines and supplies; (5) financing; (6) leadership and governance.

†Exceptionally, these two interventions only happened in RoD, since PIVOT substituted the medicine provision and financial incentives to CHWs. CHW, community health worker; HMIS, health management information systems; HSS, health system strengthening; IMCI, integrated management of child illness; MNCH, maternal, newborn and child health; MoH, Ministry of Health; RoD, rest of the district.

**Supplementary table S2:** Description of the motorized vehicle dataset, which includes GPS recordings of all the NGO vehicles every 10 seconds from March 17 to May 5, 2019 and from February 1 to April 4, 2020.

|                         | Distance (km) | %     |
|-------------------------|---------------|-------|
| <b>Slope (%)</b>        |               |       |
| [0,30]                  | 77,229        | 99.38 |
| (30,70]                 | 428           | 0.55  |
| (70,100]                | 52            | 0.67  |
| <b>Rainfall (mm)</b>    |               |       |
| [0,10]                  | 60,650        | 78.05 |
| (10,25]                 | 11,130        | 1.43  |
| (25,50]                 | 4350          | 5.60  |
| (50,75]                 | 1579          | 2.03  |
| <b>Bridge</b>           |               |       |
| No                      | 74,427        | 95.65 |
| yes                     | 3282          | 4.35  |
| <b>Residential area</b> |               |       |
| No                      | 68,631        | 88.32 |
| Yes                     | 9078          | 11.68 |
| <b>Road</b>             |               |       |
| National road           | 66,443        | 85.50 |
| Tertiary road           | 7330          | 9.43  |
| Unclassified            | 3936          | 5.07  |
| <b>Transport</b>        |               |       |
| Vehicle                 | 61,258        | 78.82 |
| Motorcycle              | 16,258        | 20.92 |

**Supplementary table S3:** Description of hospital referrals in Ifanadiana District, 2014-2020.

| <b>variables</b>            | <b>n</b> | <b>%</b> |
|-----------------------------|----------|----------|
| <b>Means of transport</b>   |          |          |
| Ambulance                   | 3456     | 40.83    |
| Ambulance pick-up point     | 169      | 1.99     |
| Tractor                     | 74       | 0.87     |
| Taxi-brousse                | 1705     | 20.14    |
| Private car                 | 117      | 1.38     |
| Walking                     | 1602     | 18.93    |
| Rolling stretcher+Ambulance | 51       | 0.60     |
| Other                       | 1290     | 15.24    |
| <b>Accessibility</b>        |          |          |
| High                        | 6573     | 77.66    |
| Medium                      | 1349     | 15.94    |
| Low CSB2                    | 494      | 5.84     |
| Low CSB1                    | 48       | 0.57     |
| <b>Year</b>                 |          |          |
| 2014                        | 411      | 4.86     |
| 2015                        | 816      | 9.64     |
| 2016                        | 1423     | 16.81    |
| 2017                        | 1403     | 16.58    |
| 2018                        | 1465     | 17.31    |
| 2019                        | 1783     | 21.07    |
| 2020 (January to July)      | 1163     | 13.74    |
| <b>Season</b>               |          |          |
| High malaria transmission   | 4522     | 53.43    |
| Low malaria transmission    | 3942     | 46.57    |

**Supplementary table S4:** Travelling walking speed values for each class of land cover and motorized speed values for road networks

| Land cover type   | Dry conditions           | Rainy conditions | Travelling Mode   |
|-------------------|--------------------------|------------------|-------------------|
|                   | Travelling speeds (km/h) |                  |                   |
| Forest            | 3                        | 2                | Walking           |
| Savanna           | 4                        | 3                | Walking           |
| Residential area  | 5                        | 4                | Walking           |
| Rice field        | 4                        | 3                | Walking           |
| National road     | 50                       | 40               | Motorized vehicle |
| Tertiary road     | 30                       | 20               | Motorized vehicle |
| Unclassified road | 20                       | 10               | Motorized vehicle |
| Path              | 5                        | 4                | Walking           |

**Supplementary table S5:** Multivariate analysis of local factors affecting the number of monthly referrals by health centers, (negative binomial linear mixed model, with health center as random intercept)

|                                       | Estimate <sup>1</sup> | 95% Confidence Intervals |
|---------------------------------------|-----------------------|--------------------------|
| Intercept                             | 0.05                  | [0.02, 0.11]             |
| <b>Geographic factors<sup>2</sup></b> |                       |                          |
| Referral time (hours, linear)         | 3.29e-24              | [1.14e-30, 9.49e-18]     |
| Referral time (hours, quadratic)      | 1.33e+08              | [56.09, 3.15e+14]        |
| <b>Health system factors</b>          |                       |                          |
| <i>Type of health center</i>          |                       |                          |
| Basic Health Center (CSB1)            | (ref)                 |                          |
| Major Health Center (CSB2)            | 7.17                  | [2.99, 17.21]            |
| <i>Removal of user fees</i>           |                       |                          |
| No                                    | (ref)                 |                          |
| Yes                                   | 1.11                  | [1.08, 1.14]             |
| <b>Time varying factors</b>           |                       |                          |
| Linear trend (year)                   | 2.30                  | [1.88, 2.81]             |
| Lagged referrals (1-month lag)        | 1.02                  | [1.01, 1.02]             |

<sup>1</sup> Model coefficients and confidence intervals are exponentiated to reflect relative change

<sup>2</sup> Orthogonal polynomial of degree 2. As results are hard to interpret, please refer to Figure 3 to observe changes in the number of referrals according to changes in geography, health system factors and over time.
